# Supplementary material for: Real-World Benchmarking and Validation of Foundation Model Transformers for Endometrial Cancer Subtyping from Histopathology
Source: Research Square preprint supplement (doi:10.21203/rs.3.rs-7689962/v1), 2025-11-04
Supplement: Supplementary file 1 [file e1e5592a49aaaf0023b68161.pdf]

## **Supplemental Appendix 2**

Table 1 (Page 1): Training configuration and hyperparameter details for the CNN pipeline, transformer pipeline with TransMIL and CLAM.

Page 2: Interpretability analysis, details of settings and methods used.

### TRAINING CONFIGURATION AND HYPERPARAMETERS

| PARAMETER                | CNN Pipeline                                                  | Transformer + TransMIL                                        | Transformer + CLAM-MB                                          |
|--------------------------|---------------------------------------------------------------|---------------------------------------------------------------|----------------------------------------------------------------|
| INPUT                    | 512×512 px tiles                                              | 512×512 px tiles → embeddings                                 | 512×512 px tiles → embeddings                                  |
| FREEZE RATIO             | 0.5                                                           | Frozen encoder                                                | Frozen encoder                                                 |
| OPTIMIZER                | Adam,<br>LR = $2 \times 10^{-4}$ ,<br>WD = $1 \times 10^{-5}$ | AdamW<br>LR = $1 \times 10^{-4}$ ,<br>WD = $1 \times 10^{-2}$ | AdamW,<br>LR = $1 \times 10^{-4}$ ,<br>WD = $1 \times 10^{-2}$ |
| BAG SIZE                 | N/A                                                           | 512 embeddings                                                | 512 embeddings                                                 |
| INSTANCE SUPERVISION     | N/A                                                           | None                                                          | Yes (K = 32)                                                   |
| DROPOUT                  | N/A                                                           | 0.25                                                          | 0.25                                                           |
| EPOCHS (MAX)             | 20                                                            | 20                                                            | 20                                                             |
| EARLY STOPPING           | Patience = 3 (min 5 epochs)                                   | Patience = 5                                                  | Patience = 5                                                   |
| TILE THRESHOLD PER SLIDE | ≥ 300 tiles                                                   | ≥ 300 tiles                                                   | ≥ 300 tiles                                                    |
| TILE SUBSAMPLING         | ≤ 4,000 tiles                                                 | N/A                                                           | N/A                                                            |
| AGGREGATION              | Mean pooling                                                  | Transformer self-attention                                    | Attention pooling + gated classifier                           |
| LOSS FUNCTION            | Cross Entropy                                                 | Cross Entropy                                                 | Cross Entropy                                                  |
| CROSS-VALIDATION         | 5-fold, slide-level stratified                                | 5-fold, slide-level stratified                                | 5-fold, slide-level stratified                                 |
| HARDWARE                 | 4× NVIDIA RTX A6000 (48 GB)                                   | 4× NVIDIA RTX A6000 (48 GB)                                   | 4× NVIDIA RTX A6000 (48 GB)                                    |

All analyses were implemented in Python 3.11 (SciPy 1.13, Statsmodels 0.15).

## Interpretability Analysis – Settings and Methods

### Tile Selection

- Selected 10 highest-predicted WSIs per molecular subtype (based on model probabilities).
- For each WSI, extracted the 8 highest-scoring tiles from attention heatmaps for the correctly predicted subtype.
- Total: 80 tiles per subtype.
- All tiles analyzed at native resolution.

### Segmentation & Classification

- Performed nucleus-instance segmentation using **HoVer-Net** (Graham et al., 2019) via **TIAToolbox** (Pocock et al., 2022).
- Applied **PanNuke** (Gamper et al., 2019) label schema:
  1. Background
  2. Neoplastic epithelial
  3. Inflammatory
  4. Connective tissue
  5. Dead cells
  6. Non-neoplastic epithelial

### Feature Extraction

- Restricted quantitative analysis to **neoplastic epithelial nuclei**.
- Computed shape features directly from instance contours:
  - Area ( $\mu\text{m}^2$ )
  - Perimeter ( $\mu\text{m}$ )
  - Eccentricity (from fitted ellipse)
  - Circularity =  $4\pi \times \text{Area} / (\text{Perimeter}^2)$
- Derived summary metrics for each tile:
  - Mean nuclear area ( $\mu\text{m}^2$ )
  - Size dispersion, coefficient of variation of area ( $\text{cv\_area}$ ) =  $\text{SD}(\text{area}) / \text{mean}(\text{area})$
  - Pleomorphism Index (PI) =  $\text{P90}(\text{area}) / \text{P10}(\text{area})$
  - Coefficient of variation of eccentricity ( $\text{cv\_ecc}$ )
  - Coefficient of variation of circularity ( $\text{cv\_circ}$ )

### Aggregation

- Summarized tile-level indices per slide and per molecular subtype.

### Statistical Analysis

- Omnibus testing with **Kruskal–Wallis** for differences among four independent subtypes.
- Reported **epsilon-squared effect size**.
- If omnibus test was significant at  $\alpha = 0.05$ , performed **Dunn’s post-hoc tests** with Holm correction for multiple comparisons.

### Visualization

- Cell-type composition shown as **split violin plots** with jittered dot overlays for per-tile proportions.
- Nuclear morphometric distributions displayed as **violin plots**.
